# Supplementary material for: Las mutaciones del populismo
Source: eLife journal article supplement (doi:10.7554/elife.67518), 2007-01-01
Supplement: supp [file elife-67518-supp-v1.zip]

A)

-  *C. aponinum*
-  *Synechocystis*
-  *Thermosynechococcus elongatus*
-  *Pisum Sativum*

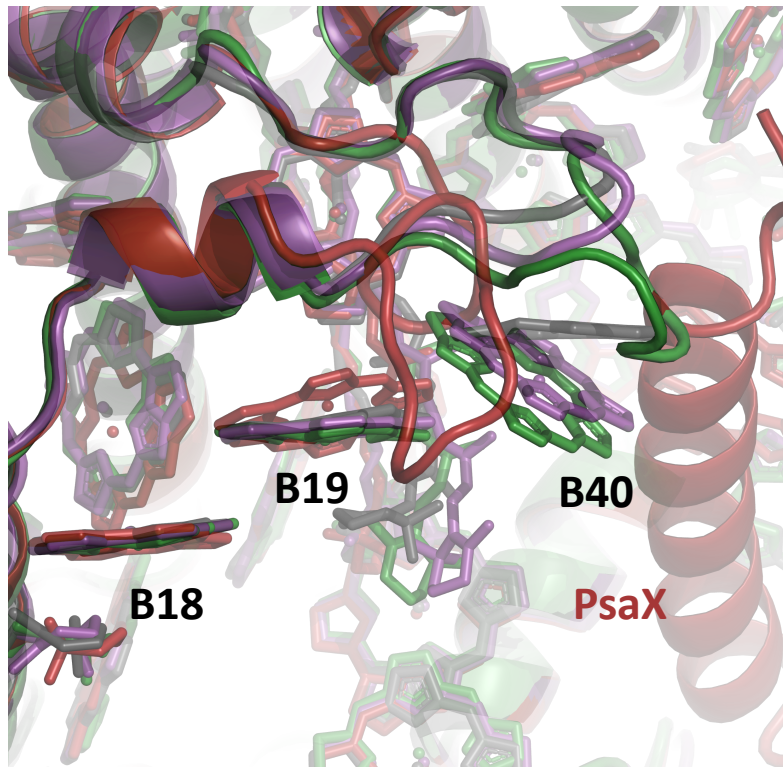

B)

*C\_aponinum*  
*Synechocystis*  
*Thermosynechococcus\_elongatus*  
*Pisum\_sativum*

310 320

301 I K D I L A A H N P P Q G T P F G G A L G A G H R G L Y D T 738

301 I K E I L N A H K G P - - - - - L T G A G H T N L Y D T 731

301 I K E M M D A K D F F - G T K V E G P F N M P H Q G I Y E T 741

301 I K Y I L E A H I P P - - - - - G G R L G R G H K G L Y D T 734
