# Supplementary material for: Las mutaciones del populismo
Source: eLife journal article supplement (doi:10.7554/elife.67518), 2007-01-01
Supplement: supp [file elife-67518-supp-v1.zip]

Archive with 21 entries (21 files):
- elife_poa_e67518_Transparent_Reporting_File.docx
- elife_poa_e67518_Figure_2_figure_supplement_1.pdf
- elife_poa_e67518_Figure_3_figure_supplement_1.pdf
- elife_poa_e67518_Figure_3_figure_supplement_2.pdf
- elife_poa_e67518_Figure_3_figure_supplement_3.pdf
- elife_poa_e67518_Figure_3_figure_supplement_4.pdf
- elife_poa_e67518_Figure_3_figure_supplement_5.pdf
- elife_poa_e67518_Figure_3_figure_supplement_6.pdf
- elife_poa_e67518_Figure_4_figure_supplement_1.pdf
- elife_poa_e67518_Figure_6_figure_supplement_1.pdf
- elife_poa_e67518_Figure_6_figure_supplement_2.pdf
- elife_poa_e67518_Figure_6_figure_supplement_3.pdf
- elife_poa_e67518_Figure_6_figure_supplement_4.pdf
- elife_poa_e67518_Figure_1_source_data_1.zip
- elife_poa_e67518_Figure_2_source_data_1.zip
- elife_poa_e67518_Figure_3_source_data_1.zip
- elife_poa_e67518_Figure_4_source_data_1.zip
- elife_poa_e67518_Figure6_Figure_Supplement2_Source_data_files.zip
- elife_poa_e67518_Figure_6_figure_supplement_3_source_data_1.zip
- elife_poa_e67518_Figure_6_figure_supplement_4_source_data_1.zip
- elife_poa_e67518_Supplementary_file_1.docx
