# Supplementary material for: Las mutaciones del populismo
Source: eLife journal article supplement (doi:10.7554/elife.67518), 2007-01-01
Supplement: supp [file elife-67518-supp-v1.zip › elife_poa_e67518_Figure_2_figure_supplement_1.pdf]

[illegible]
