# Supplementary figures and images for: Las mutaciones del populismo
Source: eLife journal article supplement (doi:10.7554/elife.67518), 2007-01-01

■ *C. aponinum*   ■ *Synechocystis*   ■ *Pisum sativum*   ■ *Pisum sativum*  
PsaH

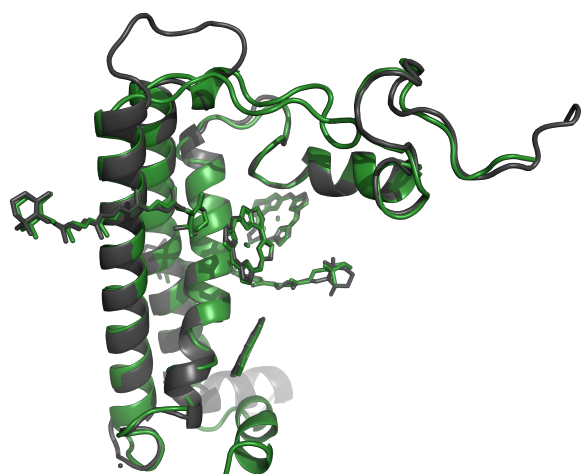

180°

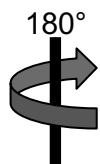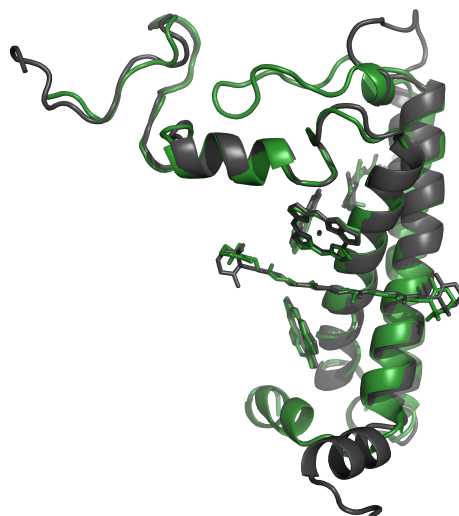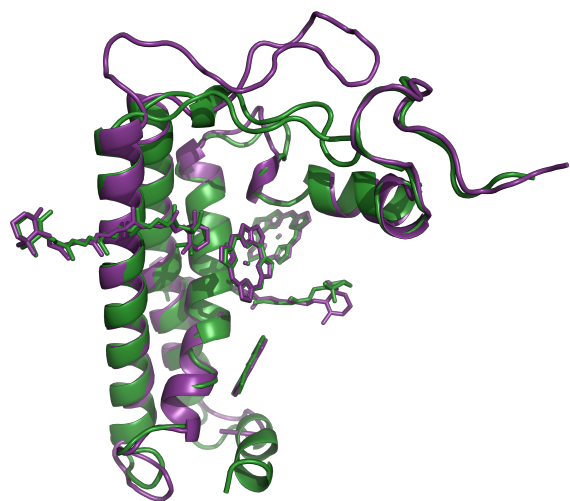

180°

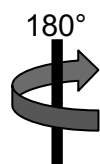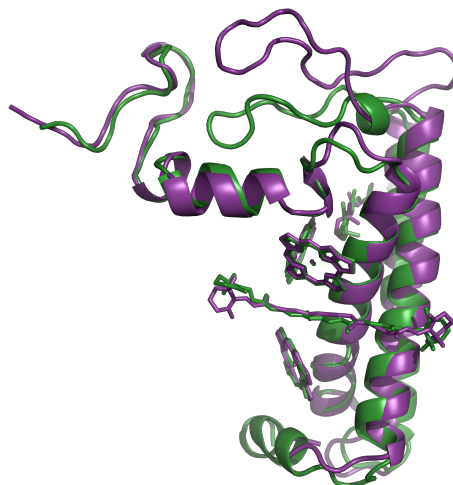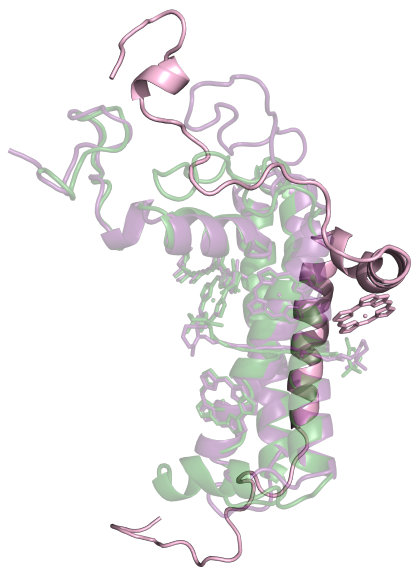

45°

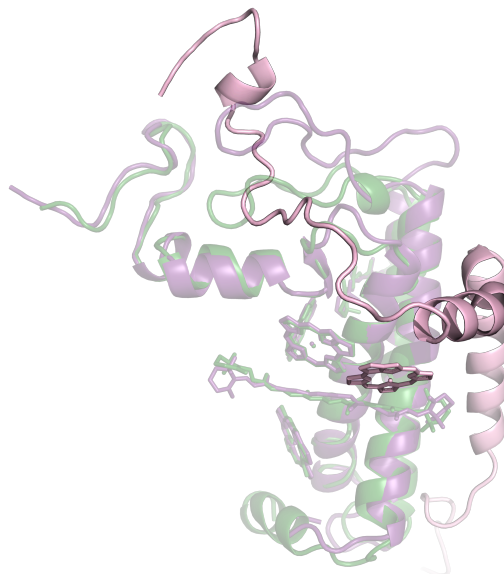

Supplement: supp [file elife-67518-supp-v1.zip]

Synechocystis

Red\_d

10%

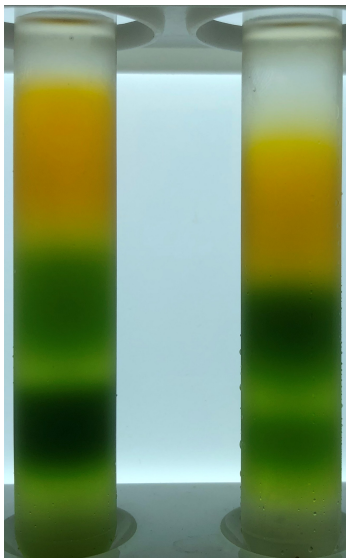

Monomer

Trimer

30%

Supplement: supp [file elife-67518-supp-v1.zip]

## Bacteria – 320 total sequences

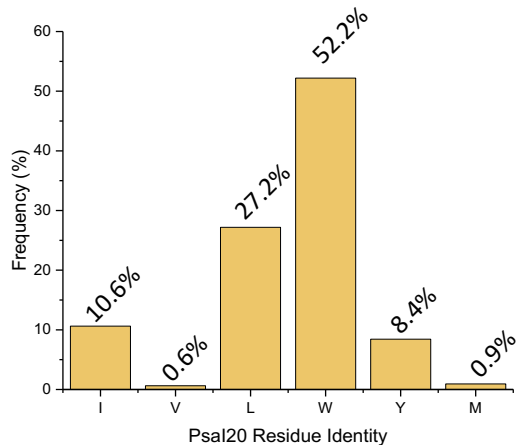

## Eukaryote - 581 total sequences

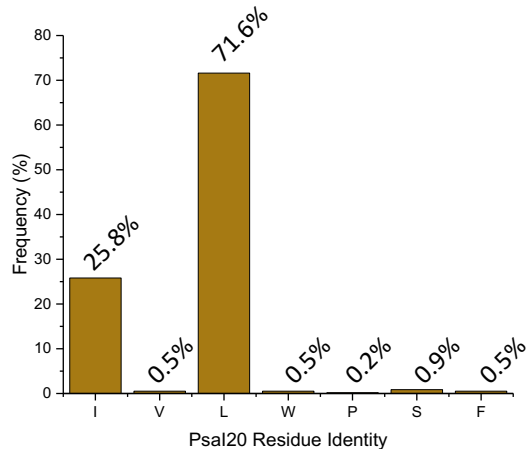

Supplement: supp [file elife-67518-supp-v1.zip]

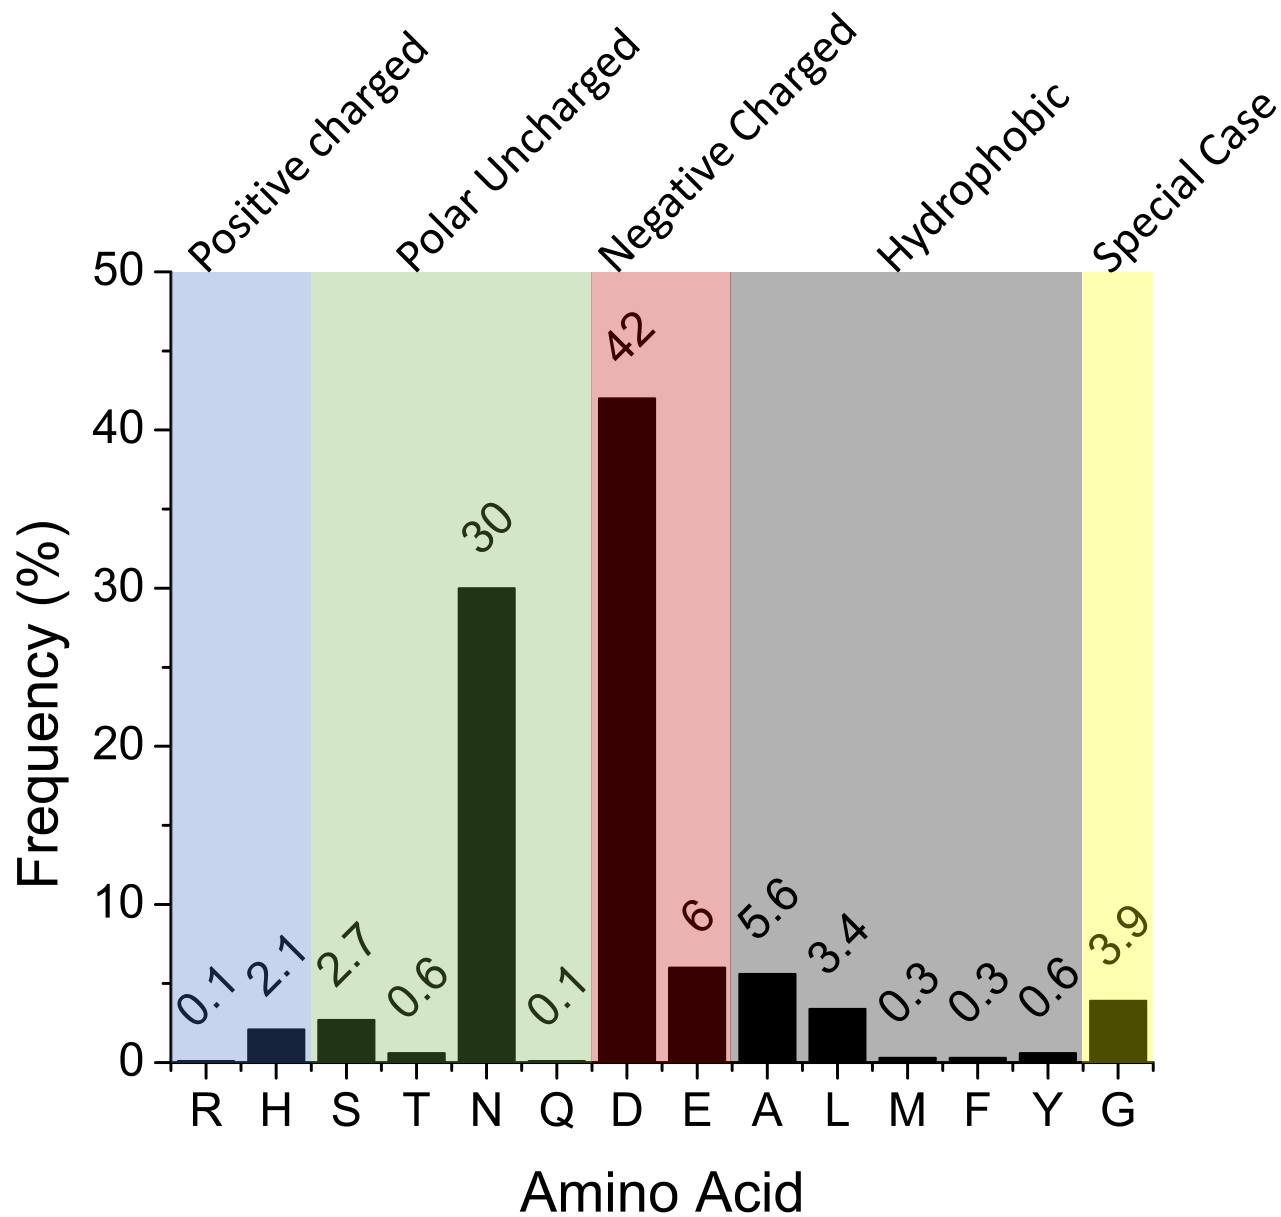

Supplement: supp [file elife-67518-supp-v1.zip]

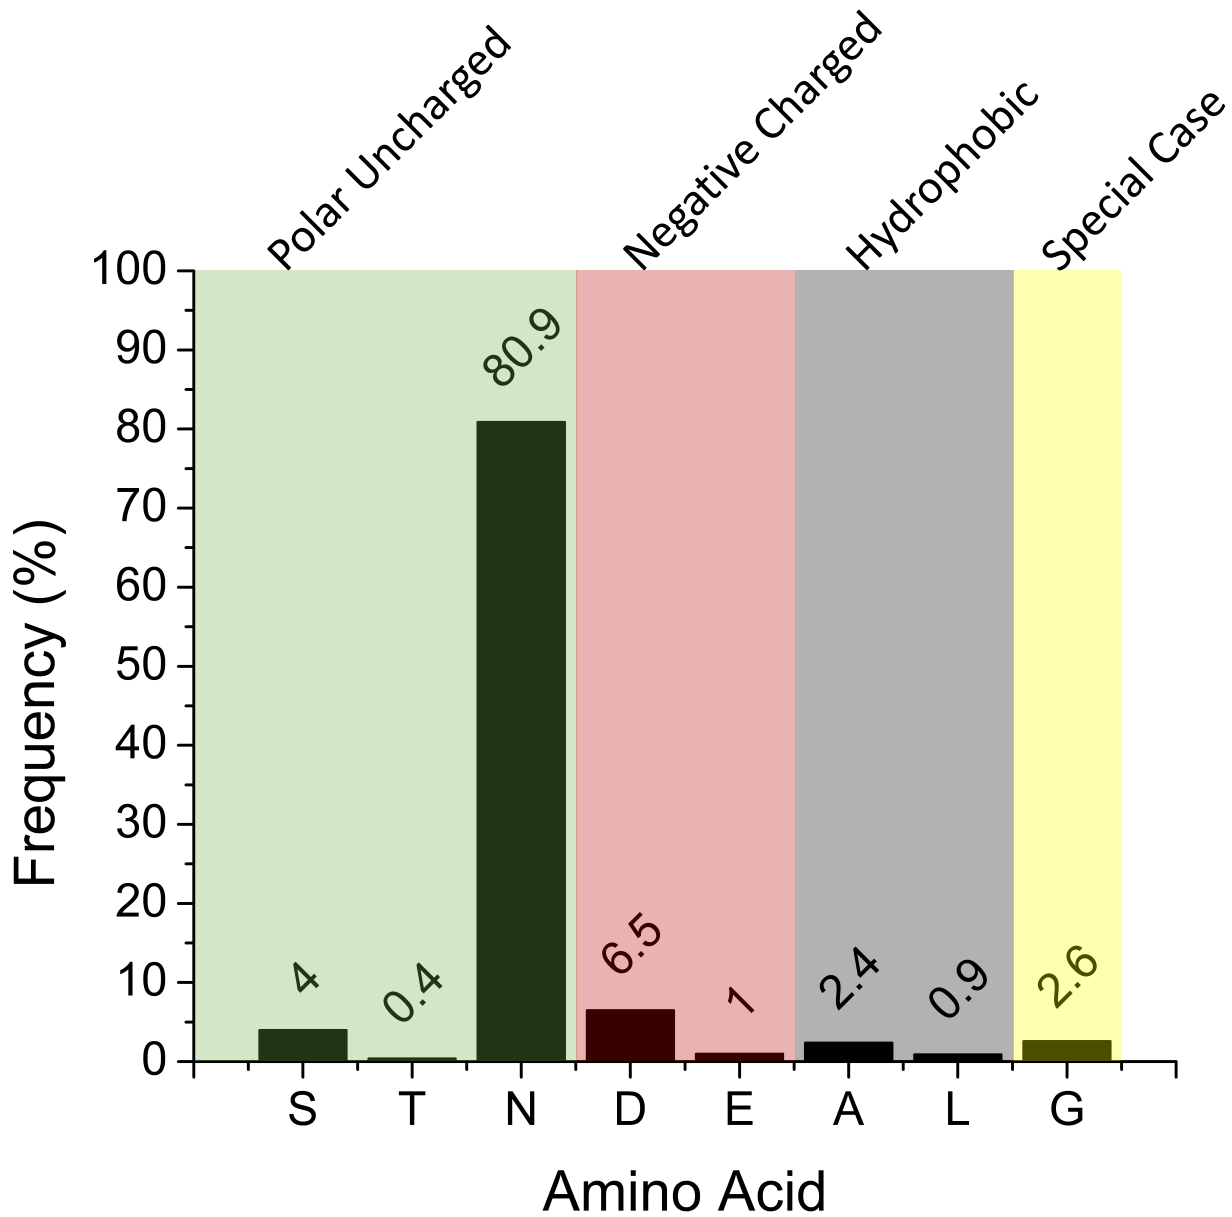

Supplement: supp [file elife-67518-supp-v1.zip]

 *C. aponinum*

 *Synechocystis*

 *Pisum sativum*

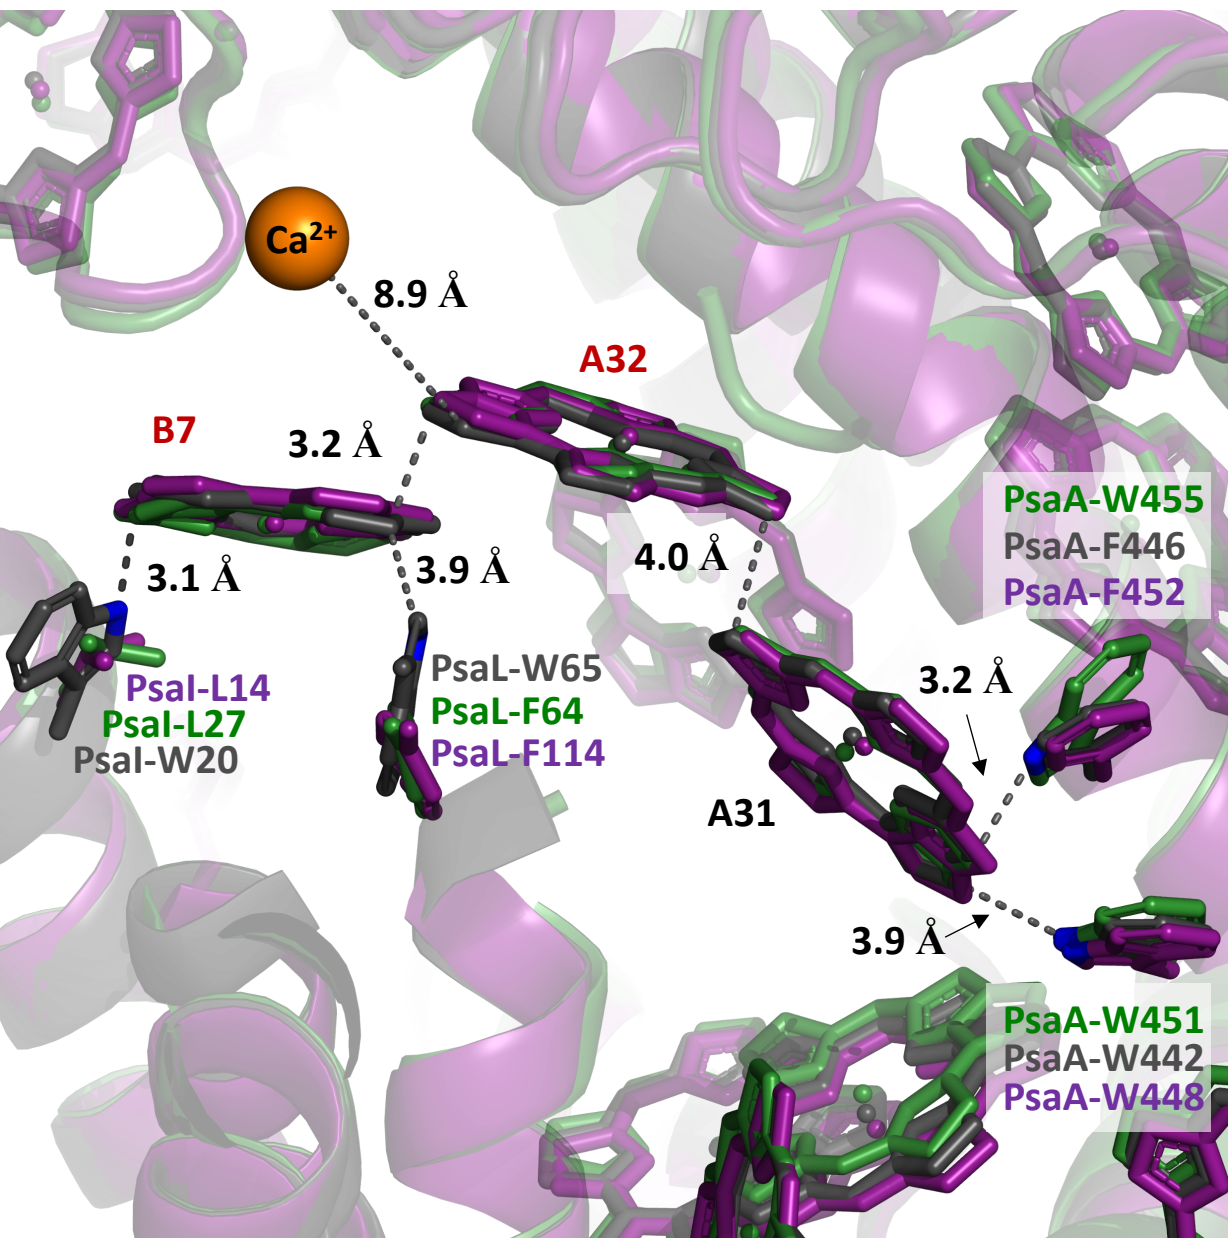

Supplement: supp [file elife-67518-supp-v1.zip]

*C. aponinum*  
WT Synechocystis

WT Synechocystis  
Red\_c  
Red\_d

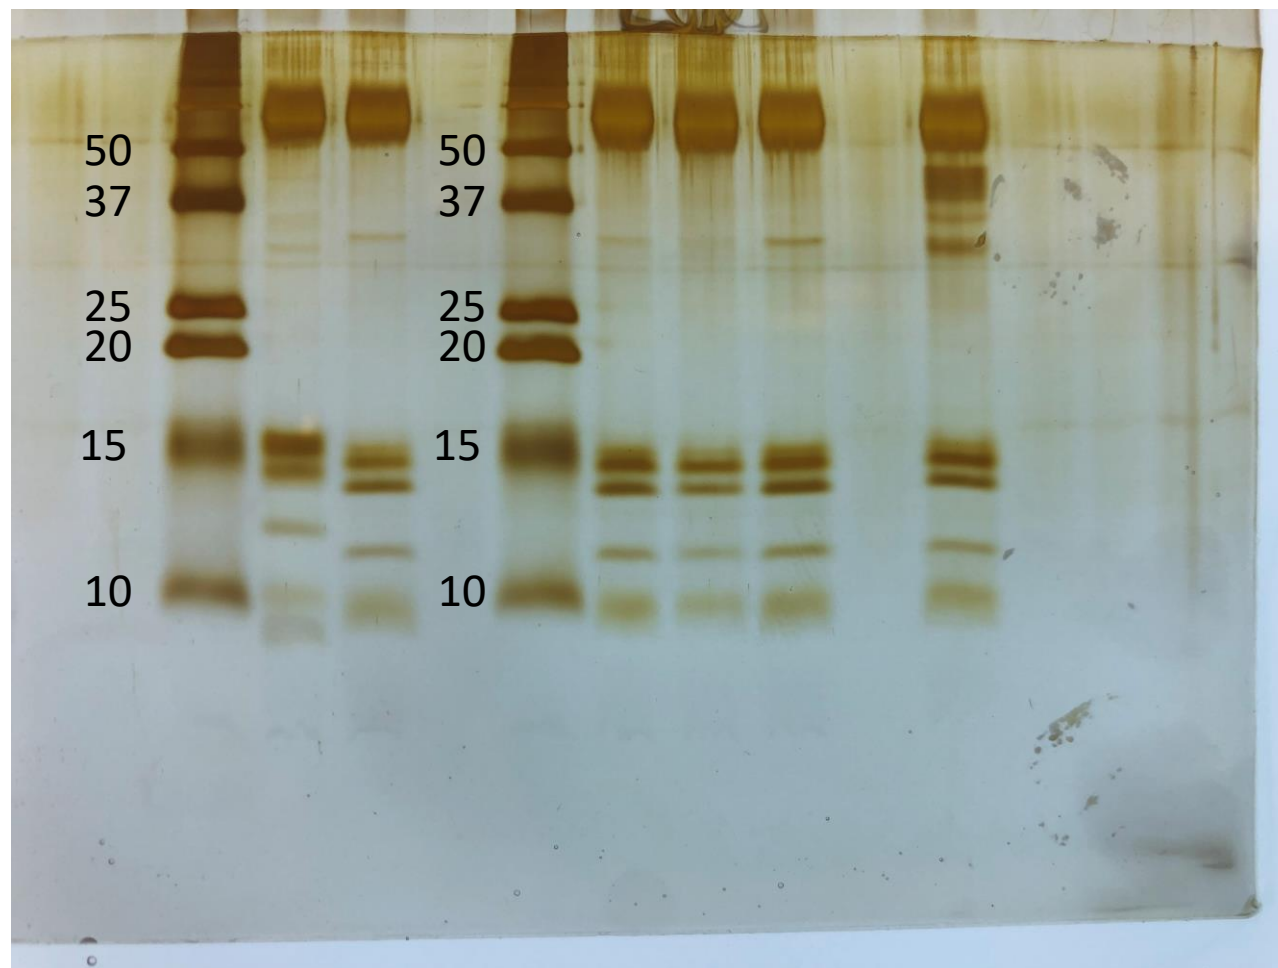

Supplement: supp [file elife-67518-supp-v1.zip]

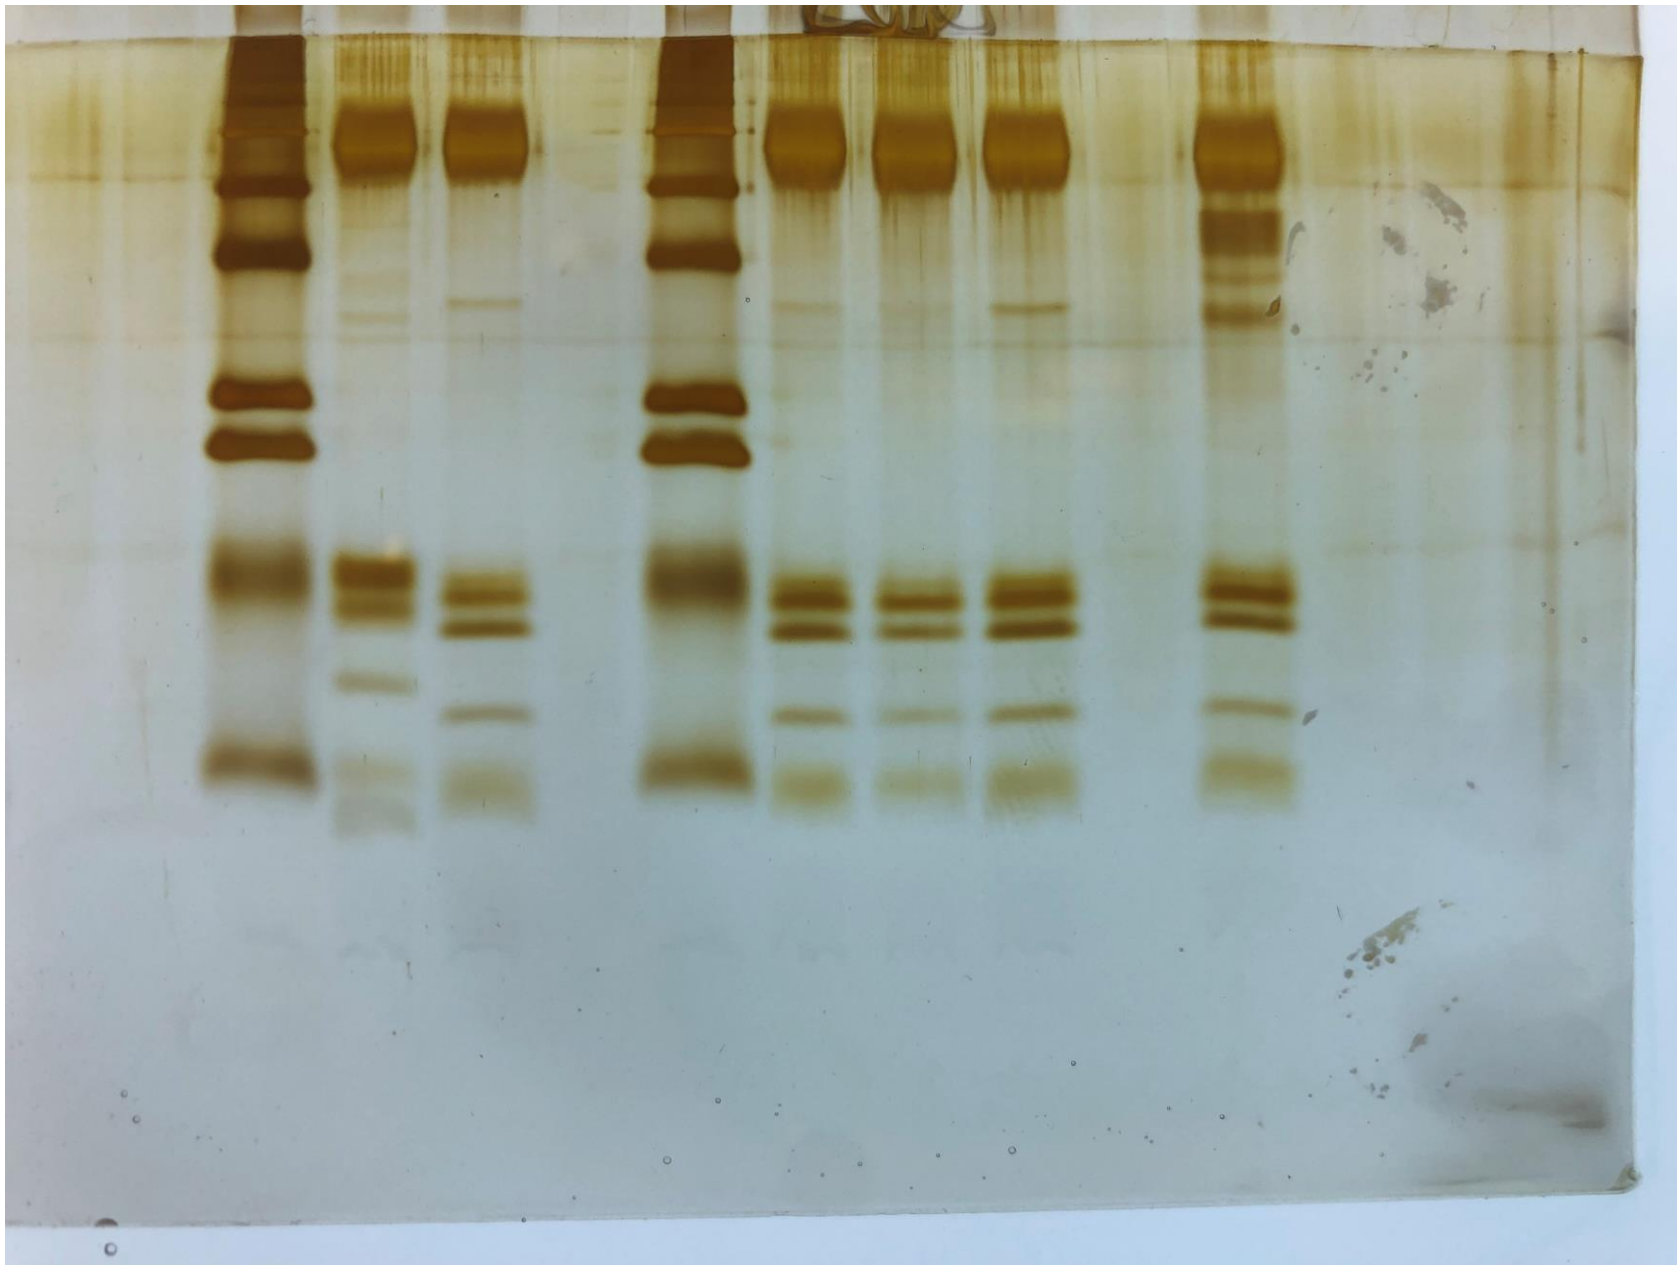

Supplement: supp [file elife-67518-supp-v1.zip]

## Bacteria – 774 total sequences

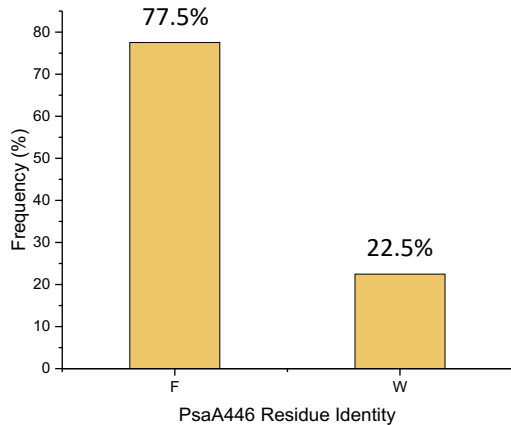

## Eukaryote - 356 total sequences

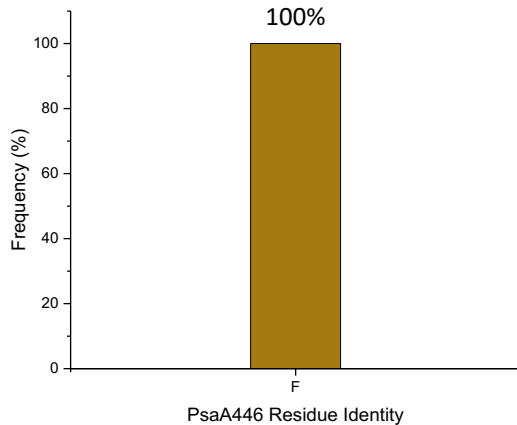

Supplement: supp [file elife-67518-supp-v1.zip]

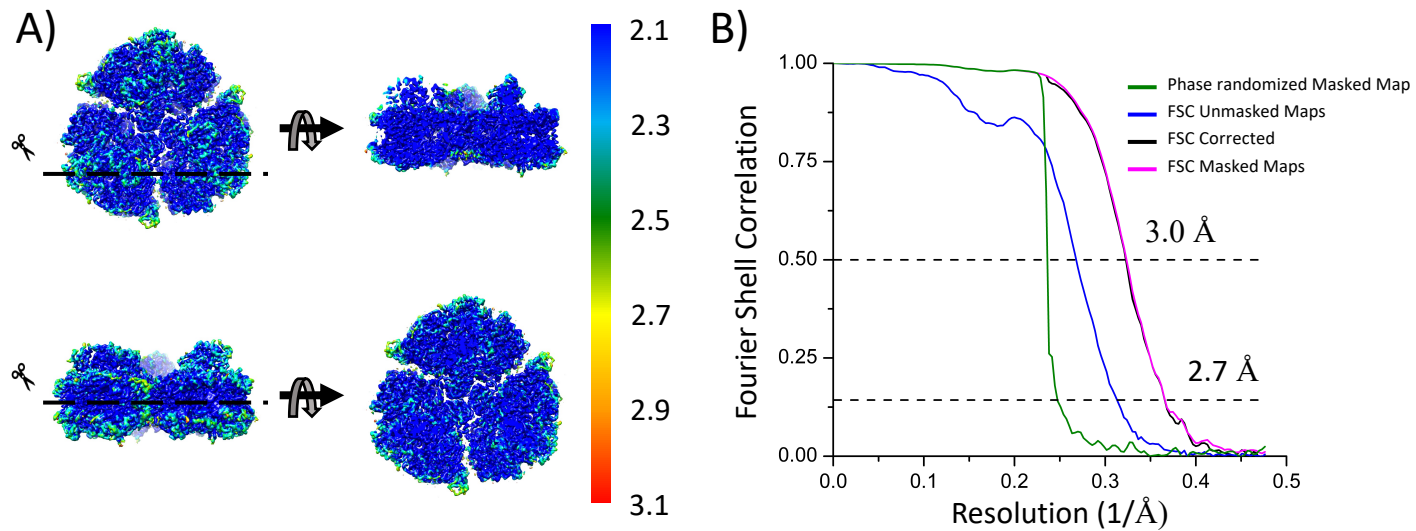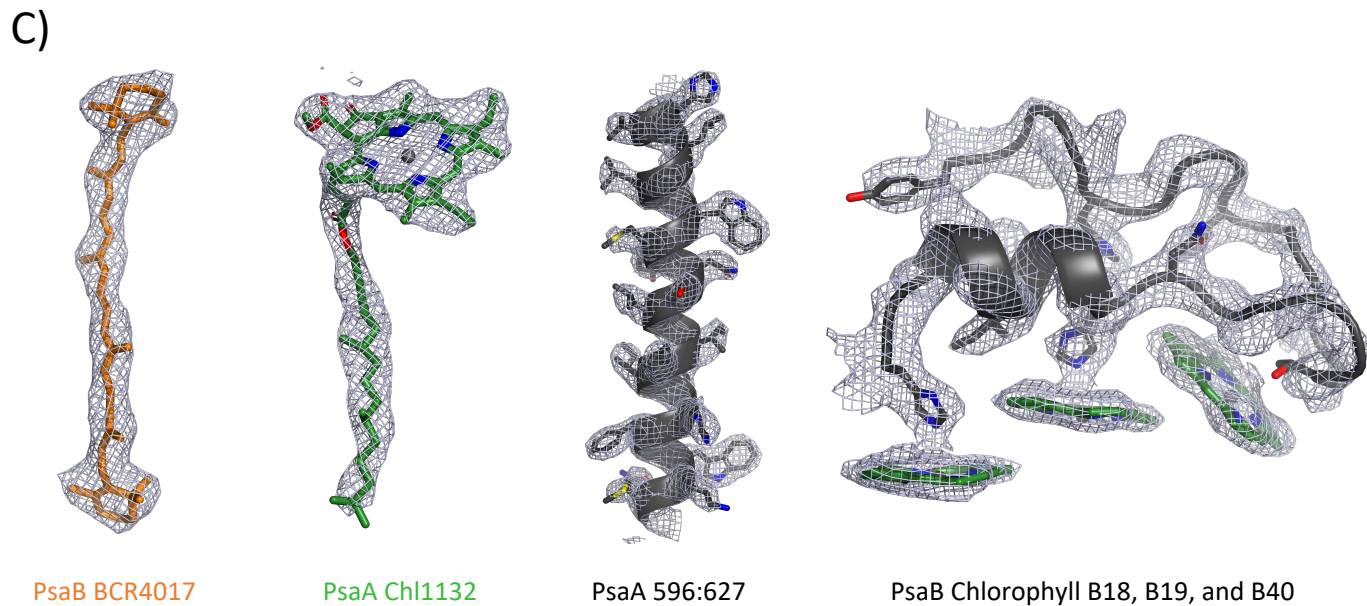

Supplement: supp [file elife-67518-supp-v1.zip]

## Bacteria – 680 total sequences

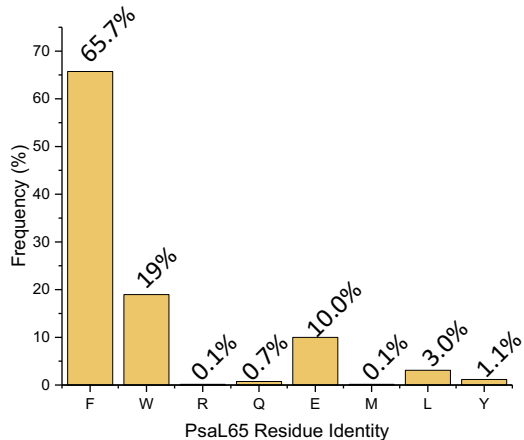

## Eukaryote - 459 total sequences

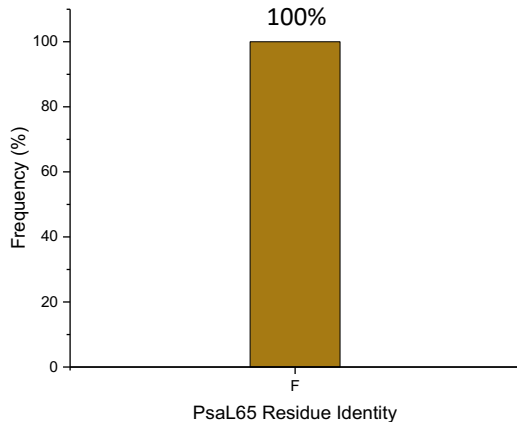

Supplement: supp [file elife-67518-supp-v1.zip]
